# Supplementary material for: Exploration of Shared Themes Between Food Security and Internet of Things Research Through Literature-Based Discovery
Source: Front Res Metr Anal. 2021 May 13;6:652285. doi: 10.3389/frma.2021.652285 (PMC8159171; doi:10.3389/frma.2021.652285)
Supplement: Supplementary file 1 [file Data_Sheet_1.xlsx]

## Sheet: B-terms
id	label	ngram	x	y	cluster	n_docs_iot	freq_food	freq_iot	n_docs_total	freq_total	TC_food	TC_iot	TC_total	IDF_food	IDF_iot	IDF_total	TFIDF_food	TFIDF_iot	TFIDF_total
188	health	1	1.5958	-0.0766	1	2536	11152	3949	11333	15101	0.0226364	0.0234668	0.0228479	1.41432	1.70664	1.30867	0.0320152	0.0400495	0.0299002
58	children	1	1.8907	-0.1397	1	49	10972	56	8535	11028	0.0222711	0.000332779	0.0166854	1.42996	3.4206	1.43181	0.0318466	0.0011383	0.0238903
274	patient	1	1.7822	-0.0101	1	254	6170	316	5022	6486	0.0125239	0.00187782	0.00981334	1.68032	2.70596	1.66213	0.0210442	0.00508131	0.0163111
52	care	1	1.83	-0.0281	1	742	4242	871	4026	5113	0.00861045	0.0051759	0.00773599	1.84225	2.24039	1.75814	0.0158626	0.011596	0.0136009
230	life	1	1.7353	-0.0428	1	647	4205	791	4159	4996	0.00853535	0.0047005	0.00755897	1.8131	2.29989	1.74402	0.0154755	0.0108106	0.013183
131	educ	1	1.6563	-0.0657	1	772	3700	1004	4046	4704	0.0075103	0.00596625	0.00711717	1.84358	2.22317	1.75598	0.0138458	0.013264	0.0124976
3	adult	1	1.9008	-0.1096	1	64	3919	70	3662	3989	0.00795483	0.000415973	0.00603537	1.8026	3.30461	1.79929	0.0143393	0.00137463	0.0108594
298	preval	1	1.7985	-0.0871	1	19	3332	19	3279	3351	0.00676333	0.000112907	0.00507008	1.84544	3.83204	1.84727	0.0124813	0.000432664	0.00936579
207	infect	1	1.6448	-0.1096	1	26	3062	33	2468	3095	0.00621528	0.000196102	0.00468275	1.97091	3.69582	1.97066	0.0122498	0.000724756	0.00922812
196	hospit	1	1.9254	0.0021	1	100	2674	137	2245	2811	0.00542771	0.000814119	0.00425305	2.02723	3.11079	2.01179	0.0110032	0.00253256	0.00855627
272	outcom	1	1.9223	-0.1047	1	22	2758	22	2545	2780	0.00559822	0.000130734	0.00420615	1.95674	3.76837	1.95732	0.0109543	0.000492656	0.00823279
134	elder	1	1.8105	-0.012	1	159	2135	203	1778	2338	0.00433364	0.00120632	0.0035374	2.14941	2.90939	2.11308	0.00931478	0.00350967	0.00747481
388	therapi	1	1.9111	-0.1288	1	36	2221	56	1722	2277	0.00450821	0.000332779	0.00344511	2.1318	3.55449	2.12698	0.0096106	0.00118286	0.00732767
276	peopl	1	1.7568	-0.0297	1	212	1822	244	1865	2066	0.00369831	0.00144996	0.00312586	2.14039	2.78446	2.09233	0.00791581	0.00403736	0.00654035
412	valid	1	1.946	-0.1073	1	166	1485	189	1486	1674	0.00301427	0.00112313	0.00253277	2.23808	2.89068	2.19099	0.00674618	0.00324661	0.00554927
313	recoveri	1	1.9573	-0.1593	1	209	993	250	1101	1243	0.0020156	0.00148562	0.00188066	2.40829	2.79065	2.32122	0.00485416	0.00414584	0.00436544
267	older adult	2	1.8085	0.0071	1	43	984	47	924	1031	0.00199733	0.000279296	0.00155991	2.41368	3.47732	2.39734	0.00482093	0.000971204	0.00373962
189	health care	2	1.7075	-0.0382	1	431	446	476	840	922	0.000905295	0.00282862	0.00139499	2.74693	2.47631	2.43873	0.00248679	0.00700455	0.003402
316	rehabilit	1	1.9506	-0.1476	1	56	783	84	718	867	0.00158934	0.000499168	0.00131177	2.5378	3.3626	2.50689	0.00403343	0.0016785	0.00328847
113	diabet	1	1.86	-0.1123	1	43	761	65	587	826	0.00154469	0.000386261	0.00124974	2.62306	3.47732	2.59437	0.0040518	0.00134315	0.00324229
118	diseas	1	1.6529	-0.1106	1	255	497	335	719	832	0.00100881	0.00199073	0.00125882	2.69214	2.70425	2.50628	0.00271587	0.00538343	0.00315495
114	diagnosi	1	1.9061	0.0266	1	237	485	277	699	762	0.000984458	0.00164607	0.00115291	2.69402	2.73604	2.51853	0.00265214	0.00450371	0.00290364
306	qualiti life	2	1.8924	-0.0747	1	25	712	25	726	737	0.00144523	0.000148562	0.00111508	2.51294	3.71285	2.50207	0.00363176	0.000551588	0.00279002
83	critic ill	2	1.8944	-0.0397	1	1	586	2	481	588	0.00118947	1.19e-05	0.000889646	2.67742	5.11079	2.68086	0.0031847	6.07e-05	0.00238502
287	physic activ	2	1.6824	-0.0784	1	57	450	68	479	518	0.000913414	0.000404088	0.000783736	2.73335	3.35492	2.68267	0.00249668	0.00135568	0.00210251
371	stroke	1	1.8402	0.0417	1	38	416	53	290	469	0.000844401	0.000314951	0.000709599	2.95726	3.53101	2.90061	0.00249711	0.0011121	0.00205827
117	disabl	1	1.7177	-0.0228	1	37	411	53	376	464	0.000834252	0.000314951	0.000702034	2.82846	3.54259	2.78782	0.00235965	0.00111574	0.00195714
174	frailti	1	1.8431	0.0461	1	8	372	9	319	381	0.000755089	5.35e-05	0.000576454	2.8659	4.2077	2.85922	0.00216401	0.000225038	0.00164821
106	dementia	1	1.8209	0.0093	1	32	175	39	195	214	0.000355217	0.000231757	0.000323783	3.14647	3.60564	3.07298	0.00111768	0.000835631	0.000994976
67	comorbid	1	1.8795	-0.1255	1	4	116	4	110	120	0.000235458	2.38e-05	0.00018156	3.33335	4.50873	3.32162	0.000784864	0.000107172	0.000603074
11	agricultur	1	-0.7615	0.0056	2	679	24355	1020	19169	25375	0.049436	0.00606133	0.0383925	1.09172	2.27892	1.08041	0.0539703	0.0138133	0.0414796
361	soil	1	-1.0373	0.0145	2	109	15407	143	9495	15550	0.0312733	0.000849774	0.0235272	1.38618	3.07337	1.38551	0.0433503	0.00261167	0.0325973
156	farm	1	-0.8781	-0.0027	2	290	14077	419	10118	14496	0.0285736	0.0024899	0.0219325	1.36619	2.64839	1.35792	0.0390371	0.00659423	0.0297825
422	water	1	-1.1114	-0.0644	2	499	13183	733	9116	13916	0.026759	0.00435584	0.021055	1.4233	2.41269	1.40321	0.0380861	0.0105093	0.0295444
84	crop	1	-1.0623	-0.0266	2	152	13418	188	9802	13606	0.027236	0.00111719	0.0205859	1.37413	2.92895	1.3717	0.0374258	0.00327218	0.0282376
62	climat	1	-1.0808	0.0152	2	92	11338	103	8834	11441	0.023014	0.000612075	0.0173103	1.41705	3.147	1.41685	0.0326119	0.0019262	0.0245261
186	growth	1	-0.9842	0.0079	2	103	11500	117	9469	11617	0.0233428	0.00069527	0.0175766	1.3871	3.09795	1.38671	0.0323789	0.00215391	0.0243735
427	yield	1	-1.0156	-0.0171	2	28	7306	32	5593	7338	0.0148298	0.000190159	0.0111024	1.61319	3.66363	1.61537	0.0239233	0.000696674	0.0179345
157	farmer	1	-0.8852	-0.0401	2	19	5447	24	4428	5471	0.0110564	0.000142619	0.00827764	1.71432	3.83204	1.7168	0.0189541	0.000546523	0.0142111
159	fertil	1	-1.0864	0.0519	2	16	4964	18	3734	4982	0.010076	0.000106965	0.00753778	1.78835	3.90667	1.79084	0.0180194	0.000417876	0.0134989
219	irrig	1	-1.0803	-0.0093	2	154	4139	221	2984	4360	0.00840138	0.00131329	0.00659669	1.90687	2.92327	1.88821	0.0160204	0.00383909	0.012456
160	field	1	-1.1224	0.0403	2	509	2542	603	2783	3145	0.00515978	0.00358331	0.0047584	2.00187	2.40407	1.9185	0.0103292	0.00861455	0.00912897
387	temperatur	1	-1.1133	-0.0272	2	439	2111	548	2308	2659	0.00428493	0.00325648	0.00402308	2.08705	2.46833	1.99977	0.00894285	0.00803805	0.00804524
13	agricultur product	2	-0.7741	0.0702	2	28	2556	40	2443	2596	0.00518819	0.000237699	0.00392776	1.97574	3.66363	1.97509	0.0102505	0.000870842	0.00775766
90	cultiv	1	-1.0648	0.0512	2	17	2131	20	1916	2151	0.00432553	0.00011885	0.00325447	2.08013	3.88034	2.08061	0.00899767	0.000461177	0.0067713
148	eros	1	-1.1638	-0.0979	2	35	1732	43	1310	1775	0.00351563	0.000255527	0.00268558	2.25315	3.56672	2.24574	0.00792124	0.000911392	0.00603111
86	crop product	2	-1.0586	0.0274	2	5	1145	5	1109	1150	0.00232413	2.97e-05	0.00173995	2.31569	4.41182	2.31808	0.00538197	0.000131086	0.00403335
87	crop yield	2	-1.1885	-0.0628	2	1	1063	1	982	1064	0.00215769	5.94e-06	0.00160984	2.36699	5.11079	2.3709	0.00510722	3.04e-05	0.00381676
381	sustain agricultur	2	-0.8654	-0.0203	2	10	932	13	891	945	0.00189178	7.73e-05	0.00142979	2.41368	4.11079	2.41313	0.00456616	0.000317568	0.00345027
317	remot sens	2	-1.2137	-0.006	2	72	814	83	774	897	0.00165226	0.000493226	0.00135716	2.51232	3.25346	2.47427	0.00415102	0.00160469	0.00335799
424	winter wheat	2	-1.1124	0.0076	2	3	797	3	739	800	0.00161776	1.78e-05	0.0012104	2.49178	4.63367	2.49437	0.0040311	8.26e-05	0.00301919
150	evapotranspir	1	-1.1483	-0.0067	2	14	629	18	528	647	0.00127675	0.000106965	0.000978913	2.64769	3.96466	2.64038	0.00338045	0.000424079	0.0025847
404	uav	1	-0.9325	-0.0189	2	357	100	523	435	623	0.000202981	0.00310792	0.000942601	3.46656	2.55812	2.72452	0.000703646	0.00795043	0.00256814
30	backscatt	1	-1.2365	-0.0044	2	245	22	447	265	469	4.47e-05	0.00265629	0.000709599	4.05763	2.72163	2.93976	0.000181197	0.00722942	0.00208605
423	water manag	2	-1.1749	-0.0407	2	55	417	64	439	481	0.000846431	0.000380319	0.000727755	2.77433	3.37043	2.72055	0.00234827	0.00128184	0.00197989
362	soil moistur	2	-1.1262	-0.0102	2	42	419	49	404	468	0.00085049	0.000291181	0.000708086	2.79995	3.48754	2.75663	0.00238133	0.00101551	0.00195193
367	spatial variabl	2	-1.1328	0.0914	2	8	231	9	234	240	0.000468886	5.35e-05	0.000363121	3.00455	4.2077	2.99379	0.00140879	0.000225038	0.00108711
135	electr conduct	2	-1.1383	0.0957	2	16	87	16	94	103	0.000176593	9.51e-05	0.000155839	3.46656	3.90667	3.38988	0.000612172	0.000371445	0.000528277
164	food	1	-0.1641	0.0627	3	230	35833	365	23068	36198	0.0727342	0.002169	0.0547677	1	2.74906	1	0.0727342	0.00596273	0.0547677
304	qualiti	1	0.0663	-0.1288	3	1310	6817	1731	7016	8548	0.0138372	0.0102864	0.0129332	1.60233	1.99352	1.51692	0.0221717	0.0205062	0.0196186
376	suppli chain	2	-0.0651	-0.0602	3	503	1680	716	1634	2396	0.00341008	0.00425481	0.00362516	2.3052	2.40922	2.14976	0.0078609	0.0102508	0.00779321
336	safeti	1	0.3343	-0.1181	3	417	1413	541	1561	1954	0.00286812	0.00321488	0.00295641	2.30023	2.49066	2.16961	0.00659734	0.00800716	0.00641424
329	rfid	1	-0.0151	-0.1432	3	1093	48	1611	1126	1659	9.74e-05	0.00957333	0.00251007	3.84014	2.07217	2.31147	0.000374149	0.0198376	0.00580196
234	logist	1	-0.0419	-0.184	3	348	406	479	701	885	0.000824103	0.00284645	0.00133901	2.81088	2.56921	2.51729	0.00231646	0.00731313	0.00337067
169	food suppli chain	3	0.0623	-0.0791	3	48	791	55	698	846	0.00160558	0.000326836	0.00128	2.54574	3.42955	2.51915	0.0040874	0.0011209	0.00322452
166	food safeti	2	0.0968	-0.0443	3	22	657	26	553	683	0.00133358	0.000154504	0.00103338	2.63356	3.76837	2.62028	0.00351208	0.00058223	0.00270775
396	traceabl	1	0.0865	-0.0816	3	159	336	212	403	548	0.000682016	0.0012598	0.000829126	2.97127	2.90939	2.7577	0.00202645	0.00366527	0.00228648
307	radio frequenc identif	3	0.124	-0.1779	3	296	14	316	308	330	2.84e-05	0.00187782	0.000499291	4.27948	2.6395	2.87446	0.000121611	0.00495651	0.00143519
326	retail	1	-0.0567	-0.0318	3	61	211	90	242	301	0.00042829	0.000534823	0.000455414	3.10098	3.32546	2.97919	0.00132812	0.00177853	0.00135677
377	suppli chain manag	3	-0.0374	-0.1176	3	138	149	154	277	303	0.000302442	0.000915141	0.00045844	3.21564	2.97091	2.92053	0.000972544	0.0027188	0.00133889
102	decis support system	3	-0.1616	-0.2159	3	92	164	108	238	272	0.000332889	0.000641787	0.000411537	3.19431	3.147	2.98643	0.00106335	0.00201971	0.00122903
397	traceabl system	2	0.1166	-0.1195	3	36	53	49	76	102	0.00010758	0.000291181	0.000154326	3.7566	3.55449	3.4822	0.000404135	0.001035	0.000537395
176	fresh produc	2	0.126	-0.1507	3	2	88	2	74	90	0.000178623	1.19e-05	0.00013617	3.50133	4.80976	3.49378	0.000625418	5.72e-05	0.000475749
187	haccp	1	0.1195	-0.0957	3	3	86	3	73	89	0.000174564	1.78e-05	0.000134657	3.51356	4.63367	3.49969	0.00061334	8.26e-05	0.000471258
125	e commerc	2	0.0497	-0.1539	3	48	27	57	72	84	5.48e-05	0.000338721	0.000127092	3.97845	3.42955	3.50568	0.000218038	0.00116166	0.000445545
167	food sector	2	0.0165	-0.0603	3	4	77	5	77	82	0.000156295	2.97e-05	0.000124066	3.49534	4.50873	3.47652	0.000546305	0.000133965	0.000431319
64	cold chain	2	0.1034	-0.1785	3	33	35	41	58	76	7.1e-05	0.000243642	0.000114988	3.96072	3.59228	3.59958	0.000281383	0.000875228	0.00041391
349	shelf life	2	0.0598	-0.1685	3	8	64	10	61	74	0.000129908	5.94e-05	0.000111962	3.63438	4.2077	3.57768	0.000472135	0.000250042	0.000400565
243	meat product	2	-0.0083	-0.0527	3	2	67	3	62	70	0.000135997	1.78e-05	0.00010591	3.58051	4.80976	3.57062	0.000486939	8.57e-05	0.000378165
170	food traceabl	2	0.144	-0.0657	3	18	43	22	57	65	8.73e-05	0.000130734	9.83e-05	3.76759	3.85552	3.60714	0.000328842	0.000504049	0.000354745
328	revers logist	2	0.08	-0.1813	3	12	15	13	27	28	3.04e-05	7.73e-05	4.24e-05	4.18257	4.03161	3.93165	0.000127347	0.000311451	0.000166561
281	perish product	2	0.0928	-0.1582	3	3	24	3	26	27	4.87e-05	1.78e-05	4.09e-05	3.99693	4.63367	3.94804	0.000194712	8.26e-05	0.000161282
288	physic internet	2	0.1075	-0.2127	3	17	2	24	19	26	4.06e-06	0.000142619	3.93e-05	5.05763	3.88034	4.08426	2.05e-05	0.000553412	0.000160667
239	manag	1	-0.1855	-0.1166	4	5293	14713	6767	17294	21480	0.0298646	0.0402127	0.0324993	1.27944	1.38709	1.12511	0.03821	0.0557787	0.0365655
205	industri	1	-0.0967	-0.1279	4	2940	1209	4712	3990	5921	0.00245404	0.028001	0.00895849	2.33747	1.64244	1.76204	0.00573624	0.04599	0.0157852
269	oper	1	-0.1187	-0.1867	4	1806	3657	2284	4915	5941	0.00742301	0.0135726	0.00898875	1.86604	1.85407	1.67149	0.0138516	0.0251646	0.0150246
208	inform	1	-0.2121	-0.0919	4	2559	1743	3225	4017	4968	0.00353796	0.0191645	0.0075166	2.1949	1.70272	1.75911	0.00776547	0.0326318	0.0132225
213	integr	1	-0.0896	-0.1012	4	1857	2697	2109	4203	4806	0.0054744	0.0125327	0.0072715	1.98833	1.84198	1.73945	0.0108849	0.0230849	0.0126484
175	framework	1	-0.1562	-0.1112	4	3009	1613	3209	4545	4822	0.00327408	0.0190694	0.0072957	2.17227	1.63237	1.70548	0.00711218	0.0311283	0.0124426
240	manufactur	1	-0.2337	-0.1112	4	903	102	1358	986	1460	0.000207041	0.00806988	0.00220899	3.43958	2.1551	2.36913	0.000712133	0.0173914	0.00523338
368	standard	1	-0.2659	-0.1494	4	548	887	632	1306	1519	0.00180044	0.00375565	0.00229825	2.47899	2.37201	2.24707	0.00446327	0.00890843	0.00516433
94	cyber physic system	3	-0.2319	-0.1277	4	826	6	981	830	987	1.22e-05	0.00582957	0.00149333	4.7566	2.19381	2.44393	5.79e-05	0.012789	0.00364961
217	interoper	1	-0.198	-0.1448	4	559	9	725	566	734	1.83e-05	0.0043083	0.00111054	4.51356	2.36338	2.61019	8.25e-05	0.0101821	0.00289874
35	big data analyt	3	-0.068	-0.1757	4	310	3	337	312	340	6.09e-06	0.00200262	0.000514421	5.05763	2.61943	2.86886	3.08e-05	0.00524571	0.0014758
210	inform technolog	2	-0.1659	-0.0565	4	151	42	158	192	200	8.53e-05	0.000938911	0.000302601	3.74587	2.93181	3.07971	0.000319343	0.00275271	0.000931922
308	radio frequenc identif rfid	4	-0.0599	-0.138	4	160	4	160	164	164	8.12e-06	0.000950796	0.000248133	4.7566	2.90667	3.14817	3.86e-05	0.00276365	0.000781163
206	industri revolut	2	0.001	-0.346	4	70	26	79	95	105	5.28e-05	0.000469456	0.000158865	3.96072	3.26569	3.38529	0.000209027	0.0015331	0.000537805
280	perform measur	2	-0.0858	-0.2279	4	38	26	44	59	70	5.28e-05	0.000261469	0.00010591	4.03644	3.53101	3.59216	0.000213023	0.000923249	0.000380446
414	valu creation	2	-0.2563	-0.0789	4	42	11	43	53	54	2.23e-05	0.000255527	8.17e-05	4.31727	3.48754	3.63873	9.64e-05	0.00089116	0.000297293
382	sustain suppli chain	3	-0.1389	-0.2511	4	10	28	13	37	41	5.68e-05	7.73e-05	6.2e-05	3.92729	4.11079	3.79481	0.000223206	0.000317568	0.000235404
68	competit advantag	2	-0.2265	-0.0564	4	23	15	24	38	39	3.04e-05	0.000142619	5.9e-05	4.18257	3.74906	3.78323	0.000127347	0.000534689	0.000223237
162	firm perform	2	-0.0979	-0.0819	4	19	15	19	33	34	3.04e-05	0.000112907	5.14e-05	4.21253	3.83204	3.8445	0.00012826	0.000432664	0.000197769
324	resourc base view	3	-0.1917	-0.0264	4	8	12	8	19	20	2.44e-05	4.75e-05	3.03e-05	4.31727	4.2077	4.08426	0.000105159	0.000200033	0.00012359
300	product	1	-0.5758	0.1208	5	824	17616	1179	14172	18795	0.0357571	0.00700618	0.0284369	1.23324	2.19486	1.21158	0.0440972	0.0153776	0.0344535
201	impact	1	-0.4715	0.1911	5	477	12521	489	12136	13010	0.0254152	0.00290587	0.0196842	1.292	2.43227	1.27893	0.0328364	0.00706787	0.0251748
347	servic	1	-0.224	0.1303	5	4312	3497	6185	7102	9682	0.00709825	0.0367542	0.0146489	1.91305	1.47611	1.51163	0.0135793	0.0542534	0.0221437
168	food secur	2	-0.4647	0.1121	5	12	10154	13	9155	10167	0.0206107	7.73e-05	0.0153827	1.39757	4.03161	1.40135	0.0288049	0.000311451	0.0215566
385	technolog	1	-0.1949	0.095	5	3425	3561	4037	6316	7598	0.00722815	0.0239898	0.0114958	1.89761	1.57613	1.56257	0.0137162	0.037811	0.017963
369	strategi	1	-0.4469	0.2055	5	651	2905	702	3313	3607	0.0058966	0.00417162	0.0054574	1.93345	2.29721	1.84279	0.0114008	0.00958309	0.0100568
241	market	1	-0.31	0.2183	5	261	3068	336	2693	3404	0.00622746	0.00199667	0.00515026	1.97269	2.69415	1.93277	0.0122849	0.00537934	0.00995429
111	determin	1	-0.3792	0.2039	5	141	2972	154	2988	3126	0.00603259	0.000915141	0.00472965	1.90427	2.96157	1.88763	0.0114877	0.00271026	0.00892782
2	adopt	1	-0.2889	0.1694	5	261	2548	336	2310	2884	0.00517195	0.00199667	0.0043635	2.04712	2.69415	1.9994	0.0105876	0.00537934	0.00872438
177	futur	1	-0.4284	0.1493	5	1150	1559	1207	2643	2766	0.00316447	0.00717257	0.00418497	2.1846	2.05009	1.94091	0.0069131	0.0147044	0.00812266
211	innov	1	-0.2299	0.1696	5	489	1742	621	1739	2363	0.00353593	0.00369028	0.00357523	2.26175	2.42148	2.12271	0.00799738	0.00893595	0.00758917
181	govern	1	-0.313	0.1749	5	153	1913	205	1678	2118	0.00388303	0.00121821	0.00320454	2.17539	2.9261	2.13822	0.00844709	0.0035646	0.00685201
283	perspect	1	-0.2952	0.15	5	530	1614	538	2093	2152	0.00327611	0.00319705	0.00325598	2.1647	2.38652	2.04224	0.0070918	0.00762982	0.0066495
25	attitud	1	-0.3389	0.2662	5	40	1033	45	918	1078	0.00209679	0.000267411	0.00163102	2.41516	3.50873	2.40017	0.0050641	0.000938275	0.00391472
386	technolog adopt	2	-0.2632	0.1954	5	36	429	39	449	468	0.000870788	0.000231757	0.000708086	2.74271	3.55449	2.71076	0.00238832	0.000823776	0.00191945
428	zambia	1	-0.5218	0.1782	5	2	422	2	366	424	0.00085658	1.19e-05	0.000641513	2.79756	4.80976	2.79953	0.00239633	5.72e-05	0.00179594
327	return	1	-0.6437	0.1311	5	15	370	17	348	387	0.00075103	0.000101022	0.000585532	2.83621	3.9347	2.82143	0.00213008	0.000397492	0.00165204
411	user accept	2	-0.2348	0.1396	5	75	11	77	86	88	2.23e-05	0.000457571	0.000133144	4.31727	3.23573	3.42851	9.64e-05	0.00148058	0.000456487
291	plant	1	-1.0054	-0.0781	6	189	5645	245	4798	5890	0.0114583	0.00145591	0.00891159	1.69505	2.83433	1.68195	0.0194224	0.00412652	0.0149888
236	machin	1	-0.7631	-0.287	6	2500	347	3617	2774	3964	0.000704344	0.0214939	0.00599755	2.92091	1.71285	1.9199	0.00205732	0.0368159	0.0115147
425	wireless sensor network	3	-0.7972	-0.2482	6	3095	45	3702	3130	3747	9.13e-05	0.021999	0.00566922	3.81459	1.62013	1.86747	0.00034843	0.0356413	0.0105871
34	big data	2	-0.5907	-0.2216	6	2257	100	2771	2342	2871	0.000202981	0.0164666	0.00434383	3.42924	1.75726	1.99342	0.00069607	0.0289361	0.0086591
63	cloud comput	2	-0.7328	-0.2823	6	2084	19	2240	2101	2259	3.86e-05	0.0133111	0.00341787	4.12821	1.79189	2.04058	0.00015921	0.0238522	0.00697446
184	greenhous	1	-0.8988	-0.1525	6	95	1928	148	1701	2076	0.00391347	0.000879487	0.003141	2.15291	3.13307	2.13231	0.00842537	0.00275549	0.00669756
237	machin learn	2	-0.7696	-0.2889	6	1320	185	1621	1466	1806	0.000375515	0.00963275	0.00273248	3.19431	1.99022	2.19688	0.00119951	0.0191713	0.00600293
311	real time	2	-0.75	-0.2814	6	1147	371	1381	1449	1752	0.000753059	0.00820656	0.00265078	2.87865	2.05123	2.20194	0.0021678	0.0168335	0.00583687
335	robot	1	-0.7199	-0.284	6	375	54	606	409	660	0.00010961	0.00360114	0.000998582	3.82718	2.53676	2.75129	0.000419496	0.00913523	0.00274739
353	smart agricultur	2	-0.8342	-0.2119	6	142	294	170	385	464	0.000596764	0.00101022	0.000702034	2.97305	2.9585	2.77755	0.00177421	0.00298874	0.00194993
17	anomali detect	2	-0.7602	-0.2966	6	350	2	440	351	442	4.06e-06	0.00261469	0.000668748	5.35866	2.56672	2.8177	2.18e-05	0.00671119	0.00188433
296	precis agricultur	2	-0.8217	-0.2078	6	183	159	213	332	372	0.00032274	0.00126575	0.000562837	3.18547	2.84834	2.84187	0.00102808	0.00360528	0.00159951
139	embed system	2	-0.7622	-0.2777	6	305	3	338	308	341	6.09e-06	0.00200856	0.000515934	4.88154	2.62649	2.87446	2.97e-05	0.00527546	0.00148303
355	smart farm	2	-0.8263	-0.2008	6	131	36	165	161	201	7.31e-05	0.000980509	0.000304114	3.88154	2.99352	3.15618	0.000283636	0.00293517	0.000959839
199	hydropon	1	-0.9395	-0.1202	6	25	93	42	99	135	0.000188772	0.000249584	0.000204255	3.48943	3.71285	3.36737	0.000658707	0.000926668	0.000687805
408	urban farm	2	-0.9255	-0.1041	6	6	81	6	79	87	0.000164415	3.57e-05	0.000131631	3.49534	4.33264	3.46538	0.000574684	0.00015448	0.000456153
394	tomato product	2	-0.9523	-0.1232	6	3	38	3	41	41	7.71e-05	1.78e-05	6.2e-05	3.77887	4.63367	3.75023	0.000291475	8.26e-05	0.000232638
380	sustain	1	-0.5964	-0.0972	7	573	8145	757	6999	8902	0.0165328	0.00449846	0.0134688	1.55072	2.35264	1.51797	0.0256377	0.0105832	0.0204452
200	ict	1	-0.6274	-0.1381	7	1459	7113	1856	7442	8969	0.014438	0.0110292	0.0135701	1.58174	1.94674	1.49132	0.0228372	0.021471	0.0202374
407	urban	1	-0.616	0.0734	7	404	4602	526	3314	5128	0.00934119	0.00312574	0.00775868	1.89477	2.50441	1.84266	0.0176993	0.00782814	0.0142966
60	citi	1	-0.5587	0.0738	7	2147	1614	3188	3527	4802	0.00327611	0.0189446	0.00726544	2.21878	1.77896	1.8156	0.00726897	0.0337017	0.0131912
59	china	1	-0.5796	0.0409	7	110	4952	120	4427	5072	0.0100516	0.000713097	0.00767395	1.72348	3.0694	1.7169	0.0173237	0.00218878	0.0131754
180	gis	1	-0.6185	0.0815	7	490	1322	658	1640	1980	0.00268341	0.00391015	0.00299575	2.29796	2.4206	2.14817	0.00616637	0.00946489	0.00643536
399	transit	1	-0.5649	0.0528	7	104	1686	128	1563	1814	0.00342226	0.000760637	0.00274459	2.1946	3.09376	2.16905	0.0075105	0.00235323	0.00595315
225	land use chang	3	-0.628	0.0732	7	3	1246	3	1169	1249	0.00252914	1.78e-05	0.00188974	2.29196	4.63367	2.2952	0.00579669	8.26e-05	0.00433733
231	life cycl assess	3	-0.3885	-0.1829	7	14	1056	15	867	1071	0.00214348	8.91e-05	0.00162043	2.42771	3.96466	2.42499	0.00520374	0.000353399	0.00392952
302	product system	2	-0.6431	-0.114	7	81	745	99	777	844	0.00151221	0.000588305	0.00127698	2.51605	3.20231	2.47259	0.00380479	0.00188393	0.00315743
171	food wast	2	-0.5388	-0.1458	7	20	477	21	356	498	0.000968219	0.000124792	0.000753476	2.83232	3.80976	2.81156	0.00274231	0.000475428	0.00211844
107	denitrif	1	-0.6252	0.0637	7	1	299	2	263	301	0.000606913	1.19e-05	0.000455414	2.94036	5.11079	2.94305	0.00178454	6.07e-05	0.00134031
410	urban plan	2	-0.597	0.0794	7	22	50	24	68	74	0.00010149	0.000142619	0.000111962	3.6959	3.76837	3.5305	0.000375099	0.000537443	0.000395283
195	hong kong	2	-0.5969	0.0254	7	8	43	8	48	51	8.73e-05	4.75e-05	7.72e-05	3.7566	4.2077	3.68177	0.000327883	0.000200033	0.000284097
192	heih river basin	3	-0.6274	0.0823	7	2	44	2	45	46	8.93e-05	1.19e-05	6.96e-05	3.72519	4.80976	3.7098	0.000332703	5.72e-05	0.000258195
340	secur	1	0.2574	0.3208	8	7108	18013	10392	20291	28405	0.036563	0.0617542	0.0429769	1.23864	1.25904	1.05571	0.0452885	0.0777513	0.045371
133	effici	1	0.2565	0.3417	8	3640	4877	4289	7392	9166	0.00989938	0.0254873	0.0138682	1.7844	1.54969	1.49425	0.0176644	0.0394974	0.0207225
5	africa	1	0.2707	0.3466	8	27	7908	32	6691	7940	0.0160517	0.000190159	0.0120132	1.53492	3.67943	1.53752	0.0246382	0.000699677	0.0184706
294	polici	1	0.2599	0.2889	8	388	5284	483	4688	5767	0.0107255	0.00287022	0.00872549	1.72519	2.52196	1.69202	0.0185035	0.00723857	0.0147637
124	drought	1	0.3435	0.2799	8	12	2609	17	1959	2626	0.00529577	0.000101022	0.00397315	2.06929	4.03161	2.07098	0.0109585	0.000407282	0.00822829
419	vulner	1	0.2062	0.2855	8	228	2004	290	1890	2294	0.00406774	0.00172332	0.00347083	2.13803	2.75286	2.08655	0.00869694	0.00474405	0.00724205
248	mitig	1	0.2602	0.257	8	209	1320	238	1356	1558	0.00267935	0.00141431	0.00235726	2.29909	2.79065	2.23075	0.00616008	0.00394684	0.00525846
155	famili	1	0.2755	0.3313	8	40	1490	43	1359	1533	0.00302442	0.000255527	0.00231943	2.23841	3.50873	2.22979	0.00676989	0.000896574	0.00517185
185	groundwat	1	0.3545	0.2859	8	7	1335	10	979	1345	0.0027098	5.94e-05	0.00203499	2.37099	4.26569	2.37223	0.0064249	0.000253488	0.00482746
333	river basin	2	0.355	0.2805	8	6	818	6	756	824	0.00166038	3.57e-05	0.00124672	2.4836	4.33264	2.48449	0.00412372	0.00015448	0.00309745
172	forecast	1	0.3337	0.2773	8	172	499	231	522	730	0.00101288	0.00137271	0.00110449	2.81459	2.87526	2.64534	0.00285083	0.00394691	0.00292176
81	covid	1	0.3216	0.3665	8	54	251	84	224	335	0.000509482	0.000499168	0.000506856	3.12821	3.3784	3.01276	0.00159377	0.00168639	0.00152704
273	pandem	1	0.3293	0.3736	8	28	96	39	111	135	0.000194862	0.000231757	0.000204255	3.43958	3.66363	3.31769	0.000670243	0.000849071	0.000677656
82	covid pandem	2	0.3239	0.3731	8	13	59	13	71	72	0.000119759	7.73e-05	0.000108936	3.59523	3.99685	3.51175	0.00043056	0.000308765	0.000382557
141	energi	1	-0.274	-0.427	9	5137	6891	8034	10360	14925	0.0139874	0.0477419	0.0225816	1.64074	1.40008	1.34765	0.0229497	0.0668425	0.0304321
322	resourc	1	-0.2883	-0.353	9	2080	3603	2718	5241	6321	0.00731341	0.0161517	0.0095637	1.85883	1.79273	1.6436	0.0135944	0.0289555	0.0157188
270	optim	1	-0.2424	-0.3795	9	2638	1437	3366	3768	4803	0.00291684	0.0200024	0.00726696	2.30558	1.68952	1.7869	0.006725	0.0337944	0.0129853
75	consumpt	1	-0.3968	-0.2966	9	864	3018	994	3549	4012	0.00612597	0.00590682	0.00607017	1.92971	2.17428	1.8129	0.0118214	0.0128431	0.0110046
351	simul	1	-0.2199	-0.3398	9	851	2032	1064	2673	3096	0.00412457	0.00632279	0.00468426	2.09811	2.18086	1.93601	0.00865381	0.0137891	0.00906878
16	alloc	1	-0.2683	-0.4053	9	1361	791	1718	2035	2509	0.00160558	0.0102092	0.00379613	2.53	1.97693	2.05445	0.00406211	0.0201829	0.00779893
105	demand	1	-0.4069	-0.296	9	402	1167	502	1450	1669	0.00236879	0.00298312	0.0025252	2.3383	2.50657	2.20164	0.00553893	0.00747739	0.00555959
325	resourc manag	2	-0.2628	-0.3869	9	430	529	478	928	1007	0.00107377	0.0028405	0.00152359	2.66143	2.47732	2.39546	0.00285776	0.00703685	0.00364971
405	uncertainti	1	-0.2165	-0.3589	9	107	842	121	852	963	0.0017091	0.00071904	0.00145702	2.4865	3.08141	2.43257	0.00424968	0.00221565	0.00354431
32	barrier	1	-0.1804	-0.3107	9	75	698	88	724	786	0.00141681	0.000522938	0.00118922	2.54641	3.23573	2.50327	0.00360778	0.00169209	0.00297694
142	energi consumpt	2	-0.2734	-0.4212	9	482	129	536	606	665	0.000261845	0.00318517	0.00100615	3.26524	2.42774	2.58054	0.000854987	0.00773277	0.0025964
178	genet algorithm	2	-0.2004	-0.3566	9	195	64	234	250	298	0.000129908	0.00139054	0.000450875	3.6183	2.82076	2.96507	0.000470045	0.00392237	0.00133688
392	time window	2	-0.1795	-0.3448	9	9	8	10	16	18	1.62e-05	5.94e-05	2.72e-05	4.51356	4.15655	4.15889	7.33e-05	0.000247002	0.000113263
24	architectur	1	0.2055	0.0694	10	3713	181	4372	3867	4553	0.000367396	0.0259805	0.00688871	3.17114	1.54107	1.77564	0.00116506	0.0400377	0.0122318
57	challeng	1	0.2189	0.1406	10	2521	1675	2616	4168	4291	0.00339993	0.0155455	0.0064923	2.14196	1.70922	1.74308	0.00728253	0.0265707	0.0113166
27	authent	1	0.1607	0.1807	10	1717	43	2896	1754	2939	8.73e-05	0.0172094	0.00444672	3.79046	1.87602	2.11898	0.000330838	0.0322852	0.00942251
38	blockchain	1	0.1399	0.0875	10	1454	72	2292	1500	2364	0.000146146	0.0136202	0.00357674	3.6959	1.94823	2.18692	0.000540142	0.0265352	0.00782204
55	certif	1	0.175	0.1747	10	184	462	260	541	722	0.000937772	0.00154504	0.00109239	2.80599	2.84597	2.62981	0.00263138	0.00439715	0.00287278
89	cryptographi	1	0.2218	0.0867	10	596	1	728	597	729	2.03e-06	0.00432612	0.00110298	5.35866	2.33555	2.58704	1.09e-05	0.0101039	0.00285345
354	smart contract	2	0.2228	0.0563	10	255	9	304	263	313	1.83e-05	0.00180651	0.00047357	4.45557	2.70425	2.94305	8.14e-05	0.00488526	0.00139374
41	blockchain technolog	2	0.2374	0.0421	10	153	13	159	165	172	2.64e-05	0.000944854	0.000260237	4.27948	2.9261	3.14553	0.000112925	0.00276474	0.000818581
119	distribut ledger	2	0.2097	0.0404	10	85	2	102	87	104	4.06e-06	0.000606133	0.000157352	5.05763	3.18137	3.42349	2.05e-05	0.00192833	0.000538694
69	consensus mechan	2	0.226	0.0233	10	19	2	21	20	23	4.06e-06	0.000124792	3.48e-05	5.35866	3.83204	4.06198	2.18e-05	0.000478208	0.000141353
71	consortium blockchain	2	0.2068	0.0217	10	13	3	16	15	19	6.09e-06	9.51e-05	2.87e-05	5.05763	3.99685	4.18692	3.08e-05	0.000380019	0.000120362
262	network	1	-0.2649	0.1145	11	12906	1825	19283	14335	21108	0.0037044	0.114589	0.0319365	2.20363	1	1.20661	0.00816312	0.114589	0.0385349
222	iso	1	-0.1209	0.3268	11	410	3763	473	3536	4236	0.00763817	0.00281079	0.00640908	1.86367	2.49801	1.8145	0.014235	0.00702138	0.0116293
223	knowledg	1	-0.1431	0.3402	11	489	2015	621	2138	2636	0.00409007	0.00369028	0.00398828	2.14144	2.42148	2.033	0.00875862	0.00893595	0.00810818
339	scienc	1	-0.0404	0.4794	11	279	861	333	1016	1194	0.00174767	0.00197884	0.00180653	2.49119	2.66519	2.35612	0.00435377	0.00527399	0.00425639
149	ethic	1	-0.0201	0.503	11	46	332	72	275	404	0.000673897	0.000427858	0.000611253	2.99882	3.44803	2.92368	0.0020209	0.00147527	0.00178711
259	nanoparticl	1	0.0028	0.6374	11	55	219	59	170	278	0.000444528	0.000350606	0.000420615	3.29796	3.37043	3.13256	0.00146604	0.00118169	0.0013176
154	fabric	1	0.0042	0.6295	11	186	22	207	205	229	4.47e-05	0.00123009	0.000346478	4.0799	2.84128	3.05126	0.000182191	0.00349504	0.00105719
37	biosensor	1	-0.0005	0.6309	11	77	72	101	121	173	0.000146146	0.00060019	0.00026175	3.71521	3.2243	3.28022	0.000542964	0.00193519	0.000858597
261	nanotechnolog	1	-0.0028	0.6024	11	17	95	18	95	113	0.000192832	0.000106965	0.000170969	3.46656	3.88034	3.38529	0.000668464	0.000415059	0.00057878
51	carbon nanotub	2	-0.0016	0.6219	11	65	27	82	88	109	5.48e-05	0.000487283	0.000164917	3.99693	3.29788	3.41853	0.000219051	0.001607	0.000563775
258	nanomateri	1	0.0021	0.6184	11	18	38	24	51	62	7.71e-05	0.000142619	9.38e-05	3.84014	3.85552	3.65544	0.000296201	0.000549872	0.000342903
72	consum	1	-0.2112	0.2269	12	1083	4477	1259	4616	5736	0.00908746	0.00748158	0.00867859	1.81051	2.07616	1.69874	0.016453	0.015533	0.0147427
338	scheme	1	-0.1388	0.1969	12	2463	639	2650	3026	3289	0.00129705	0.0157476	0.00497627	2.60815	1.71933	1.88214	0.0033829	0.0270752	0.00936604
278	percept	1	-0.2637	0.2832	12	200	2104	239	1936	2343	0.00427072	0.00142025	0.00354497	2.11911	2.80976	2.0761	0.00905012	0.00399057	0.00735972
401	trust	1	-0.1414	0.1593	12	1111	368	1730	1403	2098	0.00074697	0.0102805	0.00317428	2.89328	2.06508	2.21595	0.00216119	0.02123	0.00703406
1	accept	1	-0.2263	0.3051	12	167	653	237	723	890	0.00132547	0.00140837	0.00134657	2.61358	2.88808	2.50387	0.00346422	0.00406747	0.00337165
215	intent	1	-0.2031	0.323	12	92	242	106	302	348	0.000491214	0.000629903	0.000526525	3.03644	3.147	2.883	0.00149154	0.00198231	0.00151797
320	reput	1	-0.0871	0.1117	12	152	13	191	163	204	2.64e-05	0.00113501	0.000308653	4.31727	2.92895	3.15082	0.000113922	0.00332439	0.00097251
73	consum accept	2	-0.2076	0.303	12	6	118	6	122	124	0.000239518	3.57e-05	0.000187612	3.2942	4.33264	3.27665	0.000789019	0.00015448	0.00061474
358	social media	2	-0.2261	0.2849	12	65	41	72	96	113	8.32e-05	0.000427858	0.000170969	3.8673	3.29788	3.38074	0.000321845	0.00141102	0.000578003
277	perceiv risk	2	-0.2192	0.3181	12	9	68	9	73	77	0.000138027	5.35e-05	0.000116501	3.55248	4.15655	3.49969	0.000490338	0.000222302	0.000407718
295	pollut	1	1.1552	-0.1095	13	202	1415	283	1338	1698	0.00287218	0.00168172	0.00256908	2.30328	2.80544	2.23655	0.00661544	0.00471797	0.00574589
153	exposur	1	1.1406	-0.1081	13	67	1231	81	1150	1312	0.0024987	0.000481341	0.00198506	2.32403	3.28472	2.30231	0.00580704	0.00158107	0.00457023
15	air qualiti	2	1.1399	-0.1115	13	189	55	252	242	307	0.00011164	0.0014975	0.000464492	3.63438	2.83433	2.97919	0.000405741	0.00424442	0.00138381
418	vineyard	1	1.1585	-0.1098	13	8	163	11	134	174	0.000330859	6.54e-05	0.000263263	3.25829	4.2077	3.23591	0.00107803	0.000275046	0.000851893
264	occup health	2	1.1052	-0.1071	13	14	21	15	33	36	4.26e-05	8.91e-05	5.45e-05	4.0799	3.96466	3.8445	0.00017391	0.000353399	0.000209402

## Sheet: Intersecting articles
ID	Author	Year	DOI	Title	Food_Security_cluster	IOT_cluster	Citations received	Degree	Author keywords	Journal	Vol	Issue	Categories	Country	ID
17	pang, zb; chen, q; han, wl; zheng, lr	2015	https://doi.org/10.1007/s10796-012-9374-9	value-centric design of the internet-of-things solution for food supply chain: value creation, sensor portfolio and information fusion	13	2	98	13	internet-of-things (iot); food supply chain; value-centric design; sensor portfolio; information fusion; industrial information integration engineering (iiie)	inform syst front	V17	2	Computer Science, Information Systems; Computer Science, Theory & Methods	sweden	WOS:000351520100005
22	muangprathub, j; boonnam, n; kajornkasirat, s; lekbangpong, n; wanichsombat, a; nillaor, p	2019	https://doi.org/10.1016/j.compag.2018.12.011	iot and agriculture data analysis for smart farm	13	4	91	12	data mining; knowledge discovery; wireless sensor networks; agriculture data analysis; smart farm; iots	comput electron agr	V156		Agriculture, Multidisciplinary; Computer Science, Interdisciplinary Applications	thailand	WOS:000456754100045
29	shamshiri, rr; kalantari, f; ting, kc; thorp, kr; hameed, ia; weltzien, c; ahmad, d; shad, zm	2018	https://doi.org/10.25165/j.ijabe.20181101.3210	advances in greenhouse automation and controlled environment agriculture: a transition to plant factories and urban agriculture	11	4	84	19	smart agriculture; greenhouse modelling; urban agriculture; vertical farming; automation; internet of things (iot); wireless sensor network; plant factories	int j agr biol eng	V11	1	Agricultural Engineering	malaysia	WOS:000425030800001
65	wang, j; yue, hl	2017	https://doi.org/10.1016/j.foodcont.2016.09.048	food safety pre-warning system based on data mining for a sustainable food supply chain	13	2	54	11	food safety; food supply chain; pre-warning system; association rule	food control	V73		Food Science & Technology	peoples r china	WOS:000390965800013
1	zhao, gq; liu, sf; lopez, c; lu, hy; elgueta, s; chen, hl; boshkoska, bm	2019	https://doi.org/10.1016/j.compind.2019.04.002	blockchain technology in agri-food value chain management: a synthesis of applications, challenges and future research directions	13	8	48	10	blockchain technology; systematic literature network analysis; industry 4.0; internet of things (lot); agri-food value chain digitisation	comput ind	V109		Computer Science, Interdisciplinary Applications	england	WOS:000470943400007
2	lin, qj; wang, hz; pei, xf; wang, jy	2019	https://doi.org/10.1109/ACCESS.2019.2897792	food safety traceability system based on blockchain and epcis	13	8	43	8	food safety; traceability; blockchain; epcis; on-chain & off-chain; smart contract	ieee access	V7		Computer Science, Information Systems; Engineering, Electrical & Electronic; Telecommunications	peoples r china	WOS:000460580500001
3	mondal, s; wijewardena, kp; karuppuswami, s; kriti, n; kumar, d; chahal, p	2019	https://doi.org/10.1109/JIOT.2019.2907658	blockchain inspired rfid-based information architecture for food supply chain	13	8	35	5	blockchain; food supply chain (fsc); internet of things (iot); radio frequency identification (rfid)	ieee internet things	V6	3	Computer Science, Information Systems; Engineering, Electrical & Electronic; Telecommunications	mi 48823 usa	WOS:000472596200155
4	bumblauskas, d; mann, a; dugan, b; rittmer, j	2020	https://doi.org/10.1016/j.ijinfomgt.2019.09.004	a blockchain use case in food distribution: do you know where your food has been?	13	8	30	6	blockchain; supply chain management; technology & innovation; food distribution	int j inform manage	V52		Information Science & Library Science	ia 50614 usa	WOS:000519969300008
5	li, z; liu, g; liu, ln; lai, xj; xu, gy	2017	https://doi.org/10.1108/IMDS-11-2016-0489	iot-based tracking and tracing platform for prepackaged food supply chain	13	2	30	4	internet of things; food supply chain; prepackaged food; tracking and tracing	ind manage data syst	V117	9	Computer Science, Interdisciplinary Applications; Engineering, Industrial	peoples r china	WOS:000416732500008
8	chen, yy; wang, yj; jan, jk	2014	https://doi.org/10.1016/j.jfoodeng.2014.05.014	a novel deployment of smart cold chain system using 2g-rfid-sys	13	2	29	5	cold chain; food security; 2g-rfid; food traceability; temperature sensor	j food eng	V141		Engineering, Chemical; Food Science & Technology	taiwan	WOS:000339533400015
6	miranda, j; ponce, p; molina, a; wright, p	2019	https://doi.org/10.1016/j.compind.2019.02.002	sensing, smart and sustainable technologies for agri-food 4.0	9	2	28	2	agri-food 4.0; industry 4.0; agri-food production; connectivity; digitalisation; sensing; smart and sustainable systems	comput ind	V108		Computer Science, Interdisciplinary Applications	mexico	WOS:000467513100003
7	chen, ry	2015	https://doi.org/10.1016/j.foodcont.2014.11.004	autonomous tracing system for backward design in food supply chain	13	2	26	5	fuzzy cognitive maps; internet of things; food supply chain; fuzzy rule	food control	V51		Food Science & Technology	peoples r china	WOS:000350538100010
9	tsang, yp; choy, kl; wu, ch; ho, gts; lam, hy	2019	https://doi.org/10.1109/ACCESS.2019.2940227	blockchain-driven iot for food traceability with an integrated consensus mechanism	13	8	25	13	food traceability; blockchain; consensus mechanism; internet of things; shelf life management	ieee access	V7		Computer Science, Information Systems; Engineering, Electrical & Electronic; Telecommunications	peoples r china	WOS:000487233800069
10	bogataj, d; bogataj, m; hudoklin, d	2017	https://doi.org/10.1016/j.ijpe.2017.06.028	mitigating risks of perishable products in the cyber-physical systems based on the extended mrp model	13	2	22	5	cyber-physical systems; smart home; smart container; food delivery; post-harvest loss prevention; iot; material requirements planning theory; collaborative cities	int j prod econ	V193		Engineering, Industrial; Engineering, Manufacturing; Operations Research & Management Science	italy	WOS:000414814700007
11	radoglou-grammatikis, p; sarigiannidis, p; lagkas, t; moscholios, i	2020	https://doi.org/10.1016/j.comnet.2020.107148	a compilation of uav applications for precision agriculture	2	4	20	3	precision agriculture (pa); remote sensing (rs); unmanned aerial vehicle (uav)	comput netw	V172		Computer Science, Hardware & Architecture; Computer Science, Information Systems; Engineering, Electrical & Electronic; Telecommunications	greece	WOS:000528200400018
12	bu, fy; wang, x	2019	https://doi.org/10.1016/j.future.2019.04.041	a smart agriculture iot system based on deep reinforcement learning	13	15	18	2	deep reinforcement learning; smart agriculture lot; edge computing; cloud computing	future gener comp sy	V99		Computer Science, Theory & Methods	peoples r china	WOS:000502894300039
13	jin, xb; yang, nx; wang, xy; bai, yt; su, tl; kong, jl	2020	https://doi.org/10.3390/s20051334	hybrid deep learning predictor for smart agriculture sensing based on empirical mode decomposition and gated recurrent unit group model	13	4	16	3	sensing data prediction; emd; convolution operation; gru; smart sensing; iot	sensors-basel	V20	5	Chemistry, Analytical; Engineering, Electrical & Electronic; Instruments & Instrumentation	peoples r china	WOS:000525271500096
14	jin, xb; yu, xh; wang, xy; bai, yt; su, tl; kong, jl	2020	https://doi.org/10.3390/su12041433	deep learning predictor for sustainable precision agriculture based on internet of things system	13	4	16	2	deep learning predictor; gru; precision agriculture; iot; sequential two-level decomposition structure; medium- and long-term prediction	sustainability-basel	V12	4	Green & Sustainable Science & Technology; Environmental Sciences; Environmental Studies	peoples r china	WOS:000522460200151
15	alfian, g; syafrudin, m; rhee, j	2017	https://doi.org/10.3390/su9112073	real-time monitoring system using smartphone-based sensors and nosql database for perishable supply chain	13	2	16	8	iot; sensor; big data; outlier detection; perishable supply chain	sustainability-basel	V9	11	Green & Sustainable Science & Technology; Environmental Sciences; Environmental Studies	south korea	WOS:000416793400153
19	kang, mz; fan, xr; hua, j; wang, hy; wang, xj; wang, fy	2018	https://doi.org/10.1109/TCYB.2018.2858264	managing traditional solar greenhouse with cpss: a just-for-fit philosophy	13	4	14	3	big data; cropping plan; greenhouse management; internet of things (iot); modeling plant development and growth; nonlinear programming; smart agriculture; solar greenhouse; tomato	ieee t cybernetics	V48	12	Automation & Control Systems; Computer Science, Artificial Intelligence; Computer Science, Cybernetics	peoples r china	WOS:000450613100010
16	zhang, yf; zhao, l; qian, c	2017	https://doi.org/10.1108/IMDS-10-2016-0456	modeling of an iot-enabled supply chain for perishable food with two-echelon supply hubs	13	2	13	3	internet of things; conceptual model; supply chain for perishable food; two-echelon supply hubs	ind manage data syst	V117	9	Computer Science, Interdisciplinary Applications; Engineering, Industrial	peoples r china	WOS:000416732500007
24	reynolds, d; ball, j; bauer, a; davey, r; griffiths, s; zhou, j	2019	https://doi.org/10.1093/gigascience/giz009	cropsight: a scalable and open-source information management system for distributed plant phenotyping and iot-based crop management	13	4	12	2	cropsight; distributed plant phenotyping; phenomics; iot-based crop management; information system	gigascience	V8	3	Biology; Multidisciplinary Sciences	peoples r china	WOS:000466726800008
20	giagnocavo, c; bienvenido, f; ming, l; zhao, yr; sanchez-molina, ja; yang, xt	2017	https://doi.org/10.25165/j.ijabe.20171005.3089	agricultural cooperatives and the role of organisational models in new intelligent traceability systems and big data analysis	13	2	12	1	food traceability system; big data; internet of things; organisational structure; business model; agricultural cooperatives; net-chains; food supply chain	int j agr biol eng	V10	5	Agricultural Engineering	spain	WOS:000412990100011
18	jagtap, s; rahimifard, s	2019	https://doi.org/10.1016/j.wasman.2019.02.017	the digitisation of food manufacturing to reduce waste - case study of a ready meal factory	13	2	11	8	digitisation; food waste; food supply chain; internet of things	waste manage	V87		Engineering, Environmental; Environmental Sciences	england	WOS:000470947700039
21	zhang, qn; huang, t; zhu, yx; qiu, mk	2013	https://doi.org/10.1155/2013/382132	a case study of sensor data collection and analysis in smart city: provenance in smart food supply chain	13	2	11	1		int j distrib sens n			Computer Science, Information Systems; Telecommunications	peoples r china	WOS:000327341500001
23	sinha, a; shrivastava, g; kumar, p	2019	https://doi.org/10.1016/j.suscom.2019.07.001	architecting user-centric internet of things for smart agriculture	13	2	10	5	smart agriculture; internet of things; farming; sensors; social network of things; user-centric	sustain comput-infor	V23		Computer Science, Hardware & Architecture; Computer Science, Information Systems	india	WOS:000486073100009
25	alfian, g; syafrudin, m; farooq, u; ma'arif, mr; syaekhoni, ma; fitriyani, nl; lee, j; rhee, j	2020	https://doi.org/10.1016/j.foodcont.2019.107016	improving efficiency of rfid-based traceability system for perishable food by utilizing iot sensors and machine learning model	13	2	10	5	traceability; rfid; iot; machine learning; classification; tag direction; perishable food supply chain	food control	V110		Food Science & Technology	south korea	WOS:000510072500048
26	sivamani, s; bae, n; cho, y	2013	https://doi.org/10.1155/2013/161495	a smart service model based on ubiquitous sensor networks using vertical farm ontology	11	6	9	2		int j distrib sens n			Computer Science, Information Systems; Telecommunications	south korea	WOS:000328397500001
27	khan, pw; byun, yc; park, n	2020	https://doi.org/10.3390/s20102990	iot-blockchain enabled optimized provenance system for food industry 4.0 using advanced deep learning	13	8	8	5	livestock; internet of things; blockchain; advanced deep learning; industry 4; 0; provenance	sensors-basel	V20	10	Chemistry, Analytical; Engineering, Electrical & Electronic; Instruments & Instrumentation	south korea	WOS:000539323700244
28	lytos, a; lagkas, t; sarigiannidis, p; zervakis, m; livanos, g	2020	https://doi.org/10.1016/j.comnet.2020.107147	towards smart farming: systems, frameworks and exploitation of multiple sources	2	4	7	5	agriculture; big data; machine learning; smart farming; internet of things	comput netw	V172		Computer Science, Hardware & Architecture; Computer Science, Information Systems; Engineering, Electrical & Electronic; Telecommunications	greece	WOS:000528200400019
30	islam, n; marinakis, y; majadillas, ma; fink, m; walsh, st	2020	https://doi.org/10.1016/j.techfore.2017.09.016	here there be dragons, a pre-roadmap construct for iot service infrastructure	13	2	6	1	abundance; technology entrepreneurship; global finance; service based technology road-mapping; trillion sensor systems; additive manufacturing	technol forecast soc	V155		Business; Regional & Urban Planning	nm 87131 usa	WOS:000528313800006
31	symeonaki, e; arvanitis, k; piromalis, d	2020	https://doi.org/10.3390/app10030813	a context-aware middleware cloud approach for integrating precision farming facilities into the iot toward agriculture 4.0	4	4	6	1	agriculture 4.0; precision agriculture; sustainability; farm management; internet of things; middleware; context awareness; cloud; wireless sensors actuators network	appl sci-basel	V10	3	Chemistry, Multidisciplinary; Engineering, Multidisciplinary; Materials Science, Multidisciplinary; Physics, Applied	greece	WOS:000525305900084
33	voutos, y; mylonas, p; katheniotis, j; sofou, a	2019	https://doi.org/10.3390/su11123278	a survey on intelligent agricultural information handling methodologies	99	6	5	2	smart agriculture survey; intelligent knowledge acquisition; machine learning methodologies	sustainability-basel	V11	12	Green & Sustainable Science & Technology; Environmental Sciences; Environmental Studies	greece	WOS:000473753700048
34	touseau, l; le sommer, n	2019	https://doi.org/10.3390/fi11020033	contribution of the web of things and of the opportunistic computing to the smart agriculture: a practical experiment	13	4	5	1	web of things; intermittent connectivity; opportunistic computing; opportunistic sensing; precision agriculture; smart agriculture	future internet	V11	2	Computer Science, Information Systems	france	WOS:000460740900008
35	chen, jy; yang, a	2019	https://doi.org/10.1109/ACCESS.2019.2921391	intelligent agriculture and its key technologies based on internet of things architecture	4	4	5	2	intelligent agriculture; internet of things technology; data visualization analysis; cluster analysis	ieee access	V7		Computer Science, Information Systems; Engineering, Electrical & Electronic; Telecommunications	peoples r china	WOS:000473458700001
32	sott, mk; furstenau, lb; kipper, lm; giraldo, fd; lopez-robles, jr; cobo, mj; zahid, a; abbasi, qh; imran, ma	2020	https://doi.org/10.1109/ACCESS.2020.3016325	precision techniques and agriculture 4.0 technologies to promote sustainability in the coffee sector: state of the art, challenges and future trends	1	4	5	6	agriculture; market research; productivity; meteorology; systematics; bibliometrics; agriculture 4; 0; bibliometric; coffee; digital agriculture; digital transformation; industry 4; 0; precision agriculture; strategic intelligence; sustainability	ieee access	V8		Computer Science, Information Systems; Engineering, Electrical & Electronic; Telecommunications	brazil	WOS:000562079400001
36	triantafyllou, a; sarigiannidis, p; bibi, s	2019	https://doi.org/10.3390/info10110348	precision agriculture: a remote sensing monitoring system architecture	13	4	4	1	wireless sensor networks; internet of things; precision agriculture; smart farming; communication technologies; cloud computing	information	V10	11	Computer Science, Information Systems	greece	WOS:000501625300009
38	jagtap, s; bhatt, c; thik, j; rahimifard, s	2019	https://doi.org/10.3390/su11113173	monitoring potato waste in food manufacturing using image processing and internet of things approach	13	2	4	2	food waste; food sustainability; internet of things (iot); image processing; potato packing	sustainability-basel	V11	11	Green & Sustainable Science & Technology; Environmental Sciences; Environmental Studies	india	WOS:000472632200178
39	kong, xtr; zhong, ry; xu, gy; huang, gq	2017	https://doi.org/10.1108/IMDS-03-2016-0114	robot-enabled execution system for perishables auction logistics	13	2	4	2	supply chain management; multi-agent; perishables auction logistics; robot-enabled execution system	ind manage data syst	V117	9	Computer Science, Interdisciplinary Applications; Engineering, Industrial	peoples r china	WOS:000416732500011
37	gnauer, c; pichler, h; tauber, m; schmittner, c; christl, k; knapitsch, j; parapatits, m	2019	https://doi.org/10.1007/s00502-019-00745-0	towards a secure and self-adapting smart indoor farming framework	11	10	4	1	vertical farming; robotics; cloud computing; iot	elektrotech informat	V136	7	Engineering, Electrical & Electronic	austria	WOS:000491822000004
45	xu, w; zhang, zp; wang, hx; yi, y; zhang, yp	2020	https://doi.org/10.1016/j.comcom.2019.12.033	optimization of monitoring network system for eco safety on internet of things platform and environmental food supply chain	13	12	3	4	food and eco system; iot; food supply networks; mathematical modeling	comput commun	V151		Computer Science, Information Systems; Engineering, Electrical & Electronic; Telecommunications	peoples r china	WOS:000518700500034
41	iftekhar, a; cui, xh; hassan, m; afzal, w	2020	https://doi.org/10.1155/2020/5385207	application of blockchain and internet of things to ensure tamper-proof data availability for food safety	13	8	3	2		j food quality	V2020		Food Science & Technology	peoples r china	WOS:000540598300002
43	borrero, jd; zabalo, a	2020	https://doi.org/10.3390/s20072078	an autonomous wireless device for real-time monitoring of water needs	13	4	3	2	lorawan; internet of things (iot); agriculture 4.0; wireless sensor network; energy consumption	sensors-basel	V20	7	Chemistry, Analytical; Engineering, Electrical & Electronic; Instruments & Instrumentation	spain	WOS:000537110500274
48	fan, hl	2019	https://doi.org/10.1109/ACCESS.2019.2919582	theoretical basis and system establishment of china food safety intelligent supervision in the perspective of internet of things	13	2	3	1	iot; food safety; food supervision	ieee access	V7		Computer Science, Information Systems; Engineering, Electrical & Electronic; Telecommunications	peoples r china	WOS:000472043300001
47	awan, sh; ahmed, s; safwan, n; najam, z; hashim, mz; safdar, t	2019	https://doi.org/10.26782/jmcms.2019.10.00014	role of internet of things (iot) with blockchain technology for the development of smart farming	4	11	3	1	agriculture; blockchain; novel; iot; smart model	j mech contin math s	V14	5	Mechanics	pakistan	WOS:000495109800012
42	li, cl; niu, b	2020	https://doi.org/10.1177/1550147720917065	design of smart agriculture based on big data and internet of things	4	4	3	1	big data; smart agriculture; internet of things; k-means algorithm; data storage	int j distrib sens n	V16	5	Computer Science, Information Systems; Telecommunications	peoples r china	WOS:000536467000001
40	adamides, g; kalatzis, n; stylianou, a; marianos, n; chatzipapadopoulos, f; giannakopoulou, m; papadavid, g; vassiliou, v; neocleous, d	2020	https://doi.org/10.3390/atmos11060557	smart farming techniques for climate change adaptation in cyprus	2	4	3	2	smart farming; agriculture 4; 0; internet of things; climate change; irrigation; sensors; potato; cyprus	atmosphere-basel	V11	6	Environmental Sciences; Meteorology & Atmospheric Sciences	cyprus	WOS:000553597500001
44	idbella, m; iadaresta, m; gagliarde, g; mennella, a; mazzoleni, s; bonanomi, g	2020	https://doi.org/10.3390/s20061589	agrilogger: a new wireless sensor for monitoring agrometeorological data in areas lacking communication networks	2	4	3	1	wireless technologies; smart agriculture; precision farming; internet of things; agro-meteorological data; sensor; drone; microclimate monitoring	sensors-basel	V20	6	Chemistry, Analytical; Engineering, Electrical & Electronic; Instruments & Instrumentation	italy	WOS:000529139700048
46	subahi, af; bouazza, ke	2020	https://doi.org/10.1109/ACCESS.2020.3007955	an intelligent iot-based system design for controlling and monitoring greenhouse temperature	1	4	3	1	intelligent greenhouse agriculture; temperature control system; the~internet of things (iot); petri nets (pns); graph database; model transformations; model-driven architecture (mda)	ieee access	V8		Computer Science, Information Systems; Engineering, Electrical & Electronic; Telecommunications	saudi arabia	WOS:000554581500001
51	zou, yq; quan, l	2017	https://doi.org/10.1142/S0217984917400668	resource management and scheduling policy based on grid for aiot	13	4	2	1	agricultural grid; iot; wisdom agriculture; resource management	mod phys lett b	V31	19-21	Physics, Applied; Physics, Condensed Matter; Physics, Mathematical	peoples r china	WOS:000406383600067
50	ramirez-faz, j; fernandez-ahumada, lm; fernandez-ahumada, e; lopez-luque, r	2020	https://doi.org/10.3390/s20030846	monitoring of temperature in retail refrigerated cabinets applying iot over open-source hardware and software	13	2	2	6	retail cabinet refrigeration; temperature control; iot; open-source hardware and software; cloud computing	sensors-basel	V20	3	Chemistry, Analytical; Engineering, Electrical & Electronic; Instruments & Instrumentation	spain	WOS:000517786200270
58	wan, xf; zheng, t; cui, j; zhang, f; ma, zq; yang, y	2019	https://doi.org/10.3390/s19204406	near field communication-based agricultural management service systems for family farms	4	4	2	4	nfc; smart agriculture; family farm; smartphone; android app; programmable system-on-chip	sensors-basel	V19	20	Chemistry, Analytical; Engineering, Electrical & Electronic; Instruments & Instrumentation	peoples r china	WOS:000497864700054
49	baralla, g; pinna, a; tonelli, r; marchesi, m; ibba, s	2021	https://doi.org/10.1002/cpe.5857	ensuring transparency and traceability of food local products: a blockchain application to a smart tourism region	2	8	2	1	blockchain; iot; smart contract; smart tourism; supply chain; traceability	concurr comp-pract e	V33	1	Computer Science, Software Engineering; Computer Science, Theory & Methods	italy	WOS:000540210900001
52	de souza, pss; rubin, fp; hohemberger, r; ferreto, tc; lorenzon, af; luizelli, mc; rossi, fd	2020	https://doi.org/10.1016/j.measurement.2020.108042	detecting abnormal sensors via machine learning: an iot farming wsn-based architecture case study	13	9	1	1	anomaly detection algorithms; outlier detection; wireless sensor network	measurement	V164		Engineering, Multidisciplinary; Instruments & Instrumentation	brazil	WOS:000548653600010
53	yadav, s; garg, d; luthra, s	2021	https://doi.org/10.1108/JEIM-11-2019-0369	development of iot based data-driven agriculture supply chain performance measurement framework	13	2	1	12	supply chain performance measurement (scpm); agriculture supply chain (asc); internet of things (iot); supply chain operation reference (scor) model; key performance indicators (kpis); fuzzy topsis	j enterp inf manag	V34	1	Computer Science, Interdisciplinary Applications; Information Science & Library Science; Management	india	WOS:000547523400001
54	mondragon, ace; mondragon, cce; coronado, es	2021	https://doi.org/10.1080/09537287.2020.1733123	managing the food supply chain in the age of digitalisation: a conceptual approach in the fisheries sector	13	2	1	3	supply chain digitalisation; internet of things (iot); food and perishable goods supply chain; fisheries sector; wireless sensor network; time-series analysis	prod plan control	V32	3	Engineering, Industrial; Engineering, Manufacturing; Operations Research & Management Science	england	WOS:000518545800001
57	jagtap, s; rahimifard, s; duong, lnk		https://doi.org/10.1111/jfpp.14338	real-time data collection to improve energy efficiency: a case study of food manufacturer	13	2	1	1		j food process pres			Food Science & Technology	england	WOS:000502065600001
56	huang, k; shu, l; li, kl; yang, f; han, gj; wang, xc; pearson, s	2020	https://doi.org/10.1109/ACCESS.2020.2988663	photovoltaic agricultural internet of things towards realizing the next generation of smart farming	11	4	1	1	agriculture; photovoltaic systems; production; internet of things; meteorology; photovoltaic agriculture; internet of things; smart farming	ieee access	V8		Computer Science, Information Systems; Engineering, Electrical & Electronic; Telecommunications	england	WOS:000531902700001
55	iban, mc; aksu, o	2020	https://doi.org/10.1016/j.landusepol.2019.104376	a model for big spatial rural data infrastructure in turkey: sensor-driven and integrative approach	9	4	1	4	spatial data infrastructures; big data; internet of things; rural land use; inspire; lpis	land use policy	V91		Environmental Studies	turkey	WOS:000510958200076
59	kalia, a; sharma, sp	2019	https://doi.org/10.1007/978-3-319-97852-9_15	nanomaterials and vegetable crops: realizing the concept of sustainable production	1	4	1	8	agri-nanotechnology; iot; nanoagri-inputs; nanosensors; sustainable production; vegetable crops				Agriculture, Multidisciplinary; Food Science & Technology; Nanoscience & Nanotechnology	india	WOS:000553677000016
71	lin, wj; huang, xh; fang, h; wang, v; hua, yn; wang, jj; yin, hn; yi, dw; yau, lh	2020	https://doi.org/10.1109/ACCESS.2020.3014522	blockchain technology in current agricultural systems: from techniques to applications	13	8	0	6	cryptography; data integrity; supply chains; memory; ecosystems; agriculture; blockchain technology; agricultural applications; food supply chains management; data integrity; traceability	ieee access	V8		Computer Science, Information Systems; Engineering, Electrical & Electronic; Telecommunications	england	WOS:000560344100001
60	math, rm; dharwadkar, nv	2020	https://doi.org/10.4018/IJAEIS.2020100101	an intelligent irrigation scheduling and monitoring system for precision agriculture application	13	4	0	1	feed forward neural network; internet of things; machine learning; monitoring system; precision agriculture; smart irrigation	int j agric environ	V11	4	Computer Science, Interdisciplinary Applications	india	WOS:000571371400001
61	petre, ar; craciunescu, r; fratu, o	2020	https://doi.org/10.3390/s20195644	design, implementation and simulation of a fringing field capacitive humidity sensor	13	4	0	1	fringe-field; humidity sensor; capacitive measurement; low power; agriculture; iot	sensors-basel	V20	19	Chemistry, Analytical; Engineering, Electrical & Electronic; Instruments & Instrumentation	romania	WOS:000586593500001
64	butsenko, e; kurdyumov, a; semin, a	2020	https://doi.org/10.3390/math8091480	intelligent automation system on a single-board computer platform for the agro-industrial sector	13	4	0	2	intelligent automation system; iot system; smart farming; food security; arduino	mathematics-basel	V8	9	Mathematics	russia	WOS:000580847700001
67	malik, aw; rahman, au; qayyum, t; ravana, sd	2020	https://doi.org/10.1109/JIOT.2020.2967405	leveraging fog computing for sustainable smart farming using distributed simulation	13	4	0	2	data-driven simulation; fog computing; internet of flying fogs; mobility models; smart farming	ieee internet things	V7	4	Computer Science, Information Systems; Engineering, Electrical & Electronic; Telecommunications	pakistan	WOS:000537136400066
68	awan, sh; ahmed, s; ishtiaq, a; najam, z; khan, mya; nawaz, a; fahad, m; tayyab, m	2020		smart energy control internet of things based agriculture clustered scheme for smart farming	13	4	0	1	agriculture; iot; network; energy; scheme	int j adv comput sc	V11	3	Computer Science, Theory & Methods	pakistan	WOS:000524029200020
72	saad, a; benyamina, ae; gamatie, a	2020	https://doi.org/10.1109/ACCESS.2020.2974977	water management in agriculture: a survey on current challenges and technological solutions	13	4	0	2	water pollution; water resources; monitoring; irrigation; soil; sensors; data analytics; internet of things; smart agriculture; water management; water monitoring; wireless sensor networks	ieee access	V8		Computer Science, Information Systems; Engineering, Electrical & Electronic; Telecommunications	algeria	WOS:000525545900050
73	sun, zp; yu, hy; meng, xx; dong, m; wu, zd	2020		research on environmental factor monitoring technology of agricultural facilities based on internet of things and big data driven	13	4	0	2	agricultural facility environment; internet of things; big data; operation-executing device	fresen environ bull	V29	3	Environmental Sciences	peoples r china	WOS:000517349200080
74	zhou, l; qiu, zj; he, y	2020	https://doi.org/10.13031/trans.13499	application of wechat mini-program and wi-fi soc in agricultural iot: a low-cost greenhouse monitoring system	13	4	0	2	greenhouse ambient monitoring; internet of things; wechat mini-program; wi-fi soc	t asabe	V63	2	Agricultural Engineering	peoples r china	WOS:000538388500012
62	yadav, s; luthra, s; garg, d		https://doi.org/10.1007/s12063-020-00164-x	internet of things (iot) based coordination system in agri-food supply chain: development of an efficient framework using dematel-ism	13	2	0	5	covid-19; internet of things (iot); agriculture food supply chain (afsc); dematel; coordination index	oper manage res			Management	india	WOS:000571033600001
63	gnauer, c; pichler, h; schmittner, c; tauber, m; christl, k; knapitsch, j; parapatits, m	2020	https://doi.org/10.1007/s00502-020-00824-7	a recommendation for suitable technologies for an indoor farming framework	11	10	0	2	vertical farming; indoor farming; iot; cloud computing	elektrotech informat	V137	7	Engineering, Electrical & Electronic	austria	WOS:000567739700003
70	effendi, mkr; kassim, m; sulaiman, na; shahbudin, s	2020	https://doi.org/10.30880/ijie.2020.12.08.023	iot smart agriculture for aquaponics and maintaining goat stall system	11	9	0	1	iot; smart agriculture; aquaponics; goat stall; sensor; node-red; arduino	int j integr eng	V12	8	Engineering, Multidisciplinary	malaysia	WOS:000576847600023
66	gsangaya, kr; hajjaj, ssh; sultan, mth; hua, ls	2020	https://doi.org/10.1007/s13762-020-02737-6	portable, wireless, and effective internet of things-based sensors for precision agriculture	11	4	0	1	precision agriculture; internet of things; wireless sensor network; data acquisition	int j environ sci te	V17	9	Environmental Sciences	malaysia	WOS:000526467800002
69	cadenas, jm; garrido, mc; martinez-espana, r	2020	https://doi.org/10.3233/AIS-200575	development of an application to make knowledge available to the farmer: detection of the most suitable crops for a more sustainable agriculture	9	4	0	1	precision agriculture; sustainable agriculture; intelligent data analysis; clustering analysis	j amb intel smart en	V12	5	Computer Science, Artificial Intelligence; Computer Science, Information Systems; Telecommunications	spain	WOS:000574482900006
